# Supplementary material for: Case Report: Complete Response to Nivolumab in a Patient With Programmed Cell Death 1 Ligand 1-Positive and Multiple Gene-Driven Anaplastic Lymphoma Kinase Tyrosine Kinase Inhibitor-Resistant Lung Adenocarcinoma
Source: Front Immunol. 2021 Nov 4;12:686057. doi: 10.3389/fimmu.2021.686057 (PMC8600068; doi:10.3389/fimmu.2021.686057)
Supplement: Supplementary file 1 [file Table_1.xlsx]

## Sheet: Sheet1
Gene/ Biomarker	Amino acid change	Mutation frequency
		2018.12 (plasma)	2019.10 (tissue)
GRIN2A	A302T	0.014	0.028
PIK3CA	G842S	0.014	ND
SMAD2	D195N	0.013	0.029
NTRK1	D709N	0.011	0.021
BRD4	P842S	0.01	0.04
ERG	T441S	0.009	ND
BRAF	G466A	0.008	0.032
EP300	S1650F	0.008	0.027
YY1AP1	R411H	0.008	0.018
ZFHX3	G1022S	0.008	0.031
EML4-ALK	/	0.007	ND
FAT2	A980V	0.007	0.035
PIK3CA	V344M	0.006	0.027
POLE	A2002T	0.006	0.023
COL5A1	G1613S	ND	0.034
CRLF2	G212D	ND	0.031
EPHB1	A797T	ND	0.033
ERCC4	R415*	ND	0.02
ERRFI1	P291H	ND	0.035
FGFR4	H530Y	ND	0.03
KRAS	G12D	ND	0.031
LRP1B	E3696*	ND	0.02
LRP1B	W1709*	ND	0.019
MAP2K4	G294W	ND	0.03
PTPRD	S667L	ND	0.02
RECQL4	A488V	ND	0.033
RNF43	Y177C	ND	0.03
TP63	P377L	ND	0.017
TSC1	C431Y	ND	0.021
TYR	R299H	ND	0.021
U2AF1	A126V	ND	0.033
XRCC1	C132Y	ND	0.043
TMB	/	13.0Muts/Mb	14.4Muts/Mb
PD-L1(22C3)	/	TPS=60%	TPS=90%
ND: not detected
